# Supplementary material for: Repopulated microglia induce expression of Cxcl13 with differential changes in Tau phosphorylation but do not impact amyloid pathology
Source: PubMed Central journal article supplement (PMC9252071; doi:10.1186/s12974-022-02532-9), 2022-07-04

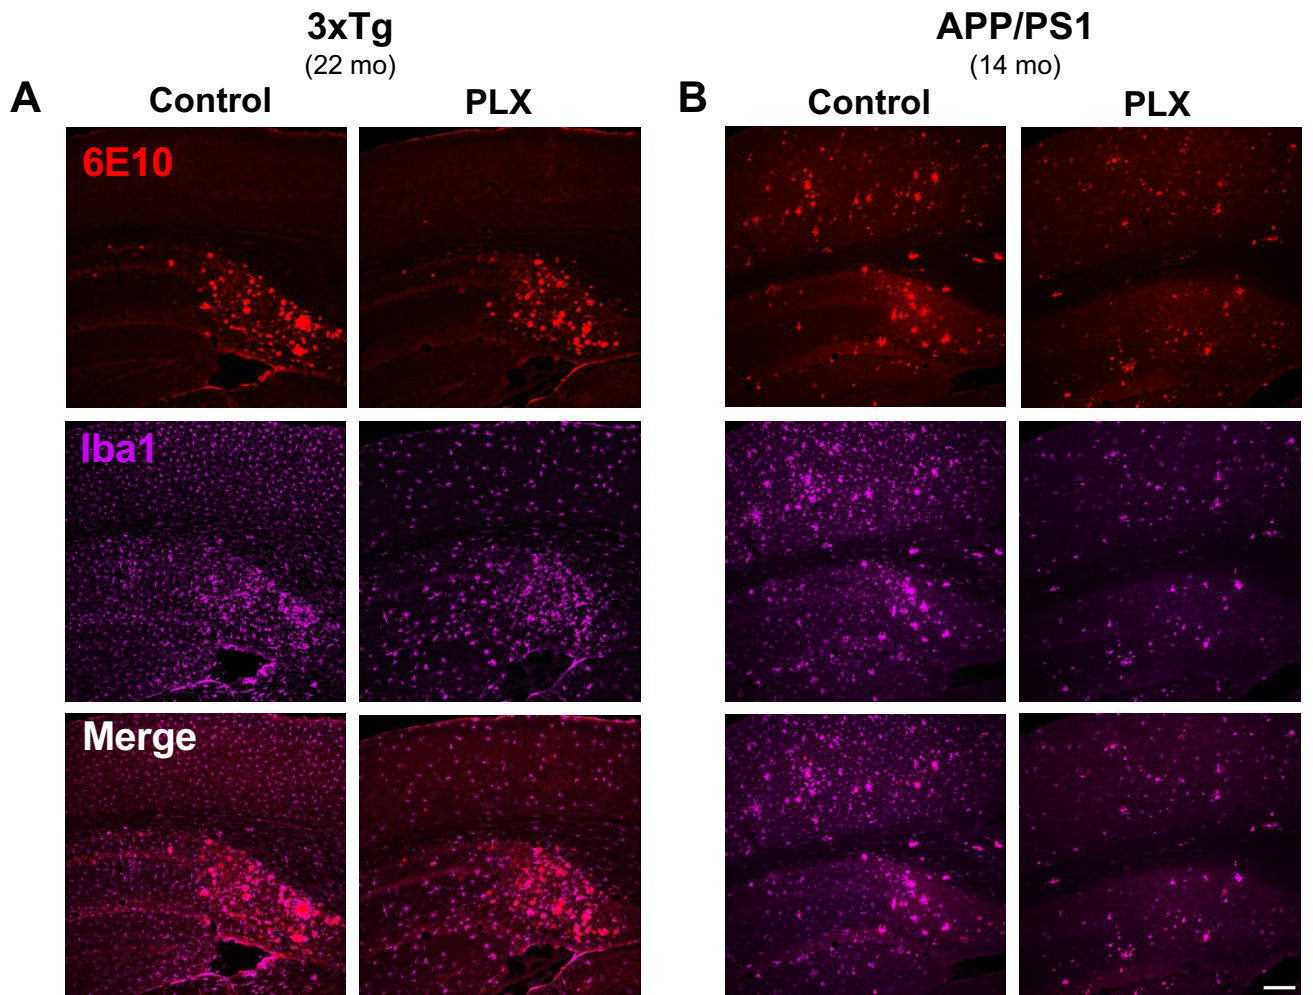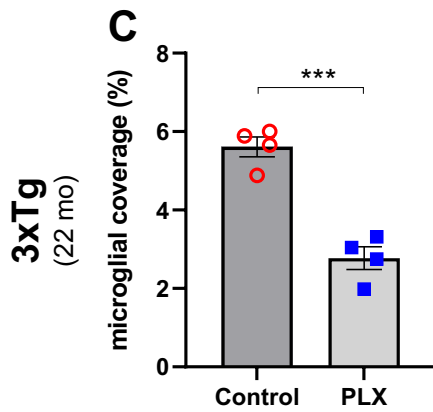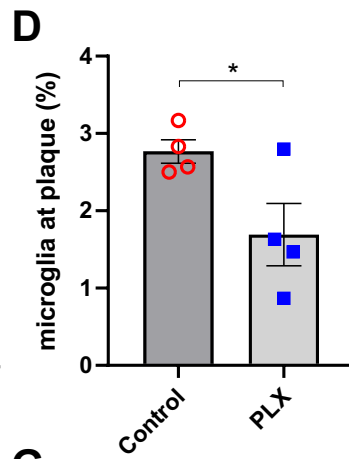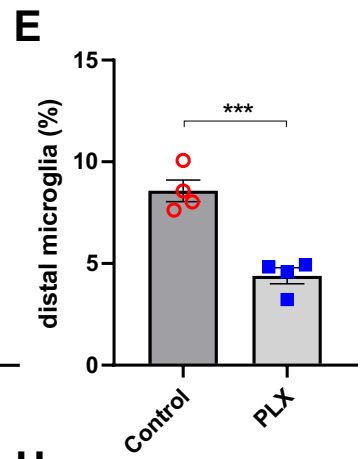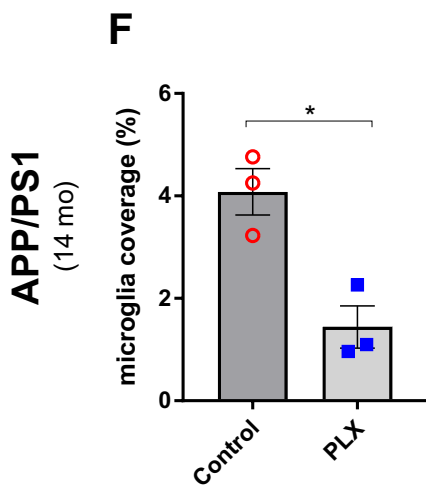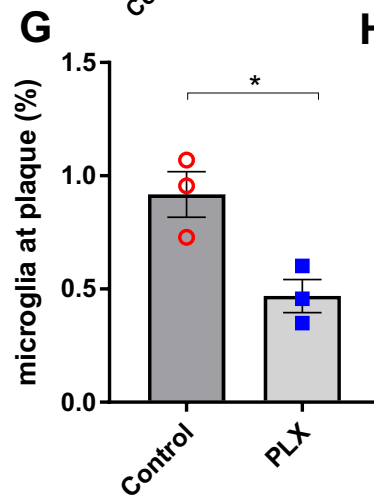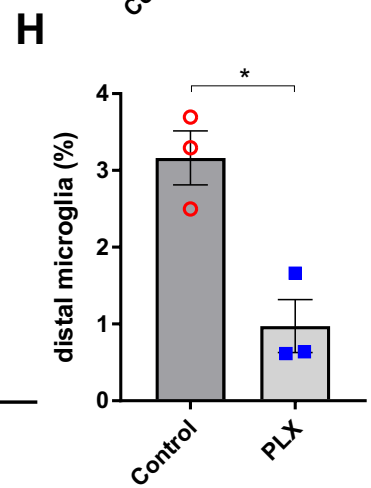

Supplement: 12974_2022_2532_MOESM1_ESM.pdf [file 12974_2022_2532_MOESM1_ESM.pdf]
