# Supplementary material for: Repopulated microglia induce expression of Cxcl13 with differential changes in Tau phosphorylation but do not impact amyloid pathology
Source: Springer Nature journal article supplement (doi:10.1186/s12974-022-02532-9), 2022-07-04

**A**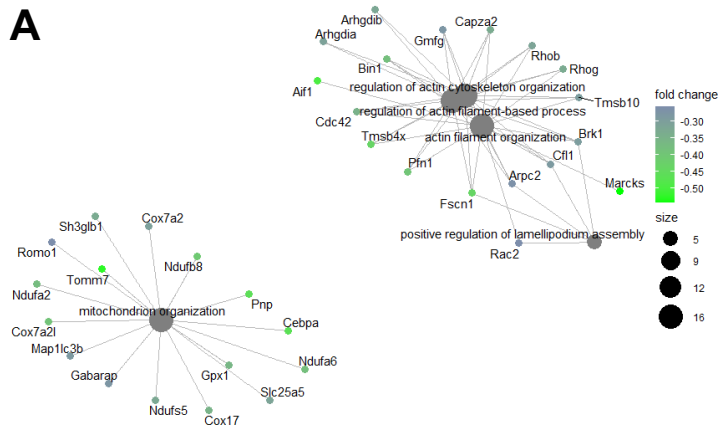**B**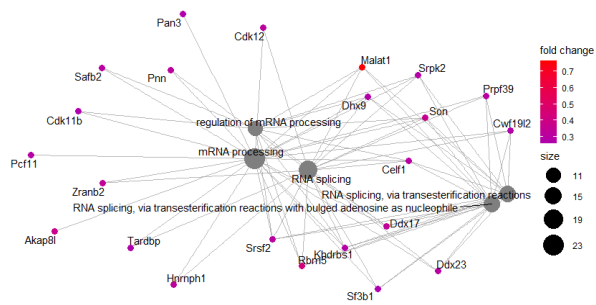

Supplement: MOESM9 [file 23236998]
